# Supplementary material for: Tissue Biomarkers for Prognosis of Prostate Cancer: A Systematic Review and Meta-analysis
Source: Oxford University Press journal article supplement (doi:10.1158/1055-9965.epi-13-0696), 2014-03-18
Supplement: 10559965epi130696-sup-tab1.xlsx [file 10559965epi130696-sup-tab1.xlsx]

## Sheet: Supplementary Table S1-40
Supplementary Table S1. Summary of 40 univariate designed studies.
Ref	First author	Year	Preservation	Sectioning	Sample size	Blinding	Adjustment	Protein assayed	Primary antibody
1	Wen Liu	2012	FFPE	TMA NO	72	blinded	Age	ANO1	Abcam(1：100)
							TNM stage
							Gleason score
2	CA DeRosa	2011	FFPE	whole section	53	blinded	PSA level，race	SPARC	Zymed Laboratories, CA, USA(1:160)
							CaP family history
							pathological T stage
							margin status，Gleason sum
3	Teemu T. Tolonen	2011	FFPE	whole section	247	blinded	GS groups	EZH2	Novocastra Laboratories Ltd（1:300）
							PSA level	Ki-67	Novocastra Laboratories Ltd., Newcastle Upon Tyne, UK(1:1500)
							perineural invasion	MCM7	Santa Cruz Biotechnology, Inc. Santa Cruz, CA, USA(1:500)
							clinical T-stage
4	Immacolata Andolfo	2011	FFPE	TMA NO	346	N/A	age,Gleason score	NM23-H1	Novocastra(1:300)
							pathological primary tumor size
							pathological nodal status
							presence of metastases
5	Rodrigo Ledezma	2011	FFPE	whole section	60	N/A	Age,PSA	syndecan-1	Novocastra Co., Newcastle,UK(1:100)
							Clinical stage	Syndecan-2	Contreras etal(1:1800）
							Surgical Gleason score
6	Marcus Thomasson	2010	FFPE	TMA 0.6 mm	648	N/A	Gleason score	LRIG1	NS
							T-score
							the manifestation of metastases at diagnosis
7	Carolina Castilla	2010	FFPE	whole section	107	N/A	Gleason score	Hsp60	Santa Cruz（1:3000)
8	Eva Compe´rat	2010	FFPE	TMA 0.6 cm	304	blinded	age，PSA level	IL16	Dako, Denmark（1:50）
							Gleason score	CCR5	Santa Cruz,CA(1:150)
							Extracapsular extension
							positive margins
9	Yong-Wook Kwon	2010	FFPE	whole section	67	blinded	Gleason score	S100A2	R&D Systems, Inc.,Minneapolis, MN, USA(NS)
							age	S100A4	Thermo Scientific, Waltham, MA, USA(NS)
10	Stefania Staibano	2010	FFPE	whole section	55	blinded	Gleason score	BAG3	Alexis Biochemicals(1:1000)
							TNM
11	Christina Hagglof	2010	FFPE	TMA NO	377	N/A	Gleason score	PDGFRb	Cell Signaling Technology, Danvers, MA, USA(2 mg/ml)
							Local tumor stage
							Tumor size,Tumor vascular density
12	Yuet-Kin Leung	2010	FFPE	whole section	144	blinded	age，preoperative PSA	ERb2	Gardner, MA, USA(1:1000）
							Gleason score
							AJCC T stage
							surgical margin
							postoperative metastasis (POM)
13	Yoshiaki Matsumura	2009	FFPE	whole section	50	N/A	age，PSA level	FADD	NS
							Gleason score
							Clinical stage
14	DM Berney	2009	FFPE	TMA 0.6mm	808	N/A	Gleason score	Ki-67	DAKO(MIBI,Carpinteria, CA, USA)(1:200)
							Serum PSA
							Clinical stage
15	TUOMAS MIRTTI	2009	FFPE	TMA NO	132	N/A	Age,Preoperative PSA	PLA2-IIA	Boehringer Mannheim GmbH, Mannheim, Germany(1:40)
							Tumor size,Preoperative clinical stage
							Gleason score,Positive surgical margins
							Seminal vesicle invasion
							Lymph node involvement
							Pathologic stage
16	Andrew D. Darnel	2009	FFPE	TMA 0.6 mm	196	N/A	age	Fascin	Dako(1:50)
							initial PSA
							Gleason score
							Tumor stage
17	Alixanna M. Norris	2009	FFPE	whole section	166	blinded	Age，PSA	PMS2	BD Biosciences（1:100）
							Largest cancer volume
							Total tumor volume
							Prostate weight
							Gleason grade
18	ELWIN A. MORGAN	2007	FFPE	whole section	70	N/A	Gleason score	C-FABP	NS(1:500)
19	Jean-Simon Diallo	2007	FFPE	TMA NO	64	N/A	Stage	NOXA	NS(50 ng/μL)
							Extraprostatic extension	PUMA	NS(4 ng/μL)
							Lymph node imetastasis
							Seminal vesicle invasion
							Gleason score
							Surgical margins
							Preoperative PSA
20	O Andre´n	2007	FFPE	TMA NO	195	N/A	Age	MUC-1	NS
							Gleason score
21	Shiva S. Forootan	2007	FFPE	whole section	70	N/A	PSA level	AR	Dako（1:100）
							Gleason score	Id-1	Santa Cruz Biotechnology（1:750）
22	syed shaheduzzaman	2007	FFPE	whole section	30	N/A	NO	LTF	NS
23	Yongnan Li	2007	FFPE	whole section	52	N/A	TNM	TS	Taiho Pharmaceutical, Saitama, Japan（1:500)
							Gleason score
							PSA level
24	Javier F. Torres-Roca	2007	FFPE	whole section	62	N/A	Age	STAT3	Cell Signaling, Danvers, Mass（1:400)
							Gleason score
							Clinical stage
25	YOSHITAKA NISHIO	2006	FFPE	whole section	50	N/A	Age	HER-2	Dako（NS)
							Serum PSA
							Gleason score
							extent of disease grade
							T/N stage
26	MARCUS L. QUEK	2006	FFPE	whole section	235	N/A	Gleason score	chromogranin A	Dako, Denmark(1:1000)
							Preoperative PSA
							Primary tumor stage
							Surgical margin status
							Positive nodes
							Lymph node density
							Age
27	ALEXANDRA PRTILO	2005	FFPE	TMA 0.6mm	223	N/A	node status	hMSH2	Cambridge, Massachusetts(1μg/ml)
							Gleason score
28	Sucharita Bandyopadhyay	2004	FFPE	whole section	81	N/A	NO	Drg-1	NS(1：100)
								PTEN	Upstate Biotechnology（1:200)
29	Sucharita Bandyopadhyay	2003	FFPE	whole section	62	N/A	age	Drg-1	NS(1：100)
							Gleason grade
							Differentiation
							Nuclear grade
							Metastasis status
30	Takefumi Satoh	2003	FFPE	whole section	152	N/A	Preoperative PSA	Caveolin-1	Santa Cruz, CA（1:400)
							Clinical stage
							Gleason score
							Extraprostatic extension
							Seminal vesicle invasion
							Lymph node involvement
							Margin positive
31	DAVID G. BOSTWICK	2002	FFPE	whole section	132	blinded	age	chromogranin A	Dako Corp., Carpinteria, California(1:50)
							Gleason score	serotonin	Dako Corp., Carpinteria, California(1:50)
							DNA ploidy
							cancer volume
32	Pernilla Wikstrom	2002	FFPE	whole section	72	N/A	Gleason score	Endoglin	DAKO Corporation, Carpinteria, CA(1:10)
							local tumor stage
33	Susan M. Henshall	2000	FFPE	whole section	206	N/A	Gleason grade	p16	Neomarkers, CA(NS)
							pathological stage
							margin status
							NHT
							preoperative PSA
34	Marinus A. NOORDZIJ	1999	FFPE	whole section	74	blinded	NS	CD44	Bender, Vienna, Austria(NS)
35	Joan MOROTE	1999	FFPE	whole section	70	N/A	Age	HER-2	Biogenex, San Ramon, CA(1:40）
							Serum PSA
							Gleason score
							Bone extension
							Extra-osseous metastases
36	MARIE-CLAUDE BETTENCOURT	1998	FFPE	whole section	149	N/A	age	MVD	NS
							Pathological stage
							Gleason sum
							Pretreatment PSA
							Race
							Nuclear grade
							Differentiation
37	Isaac Vi Kim	1998	FFPE	whole section	52	N/A	Gleason score	TGF-β	NS(2μg/ml)
							Clinical stage
							Initial treatment
38	JOHN J. BAUER	1996	FFPE	whole section	175	blinded	age	Bcl-2	Dako, Carpinteria, California(1:160)
							Race	P53	Signet Labs, Bedham, Massachusetts(1:80)
							Tumor stage
							Gleason score
							Nuclear grade
39	M.SALAH SHURBAJ	1994	FFPE	whole section	109	N/A	Grade	p53	Dako,Carpinteria,CA(1:20)
							Stage
40	Rainy Umbas	1994	FFPE	whole section	89	N/A	Gleason score	E-Cadherin	Eurodiagnostica BV, Apeldoorn, the Netherlands(NS)
							Clinical stage
							Metastasis
							Initial treatment
Abbreviations: FFPE = formalin fixed; TMA = tissue microarray; N/A = not available; NS = not specified.
REFERENCES
1	Liu W, Lu M, Liu B, Huang Y, Wang K. Inhibition of Ca(2+)-activated Cl(-) channel ANO1/TMEM16A expression suppresses tumor growth and invasiveness in human prostate carcinoma. Cancer letters. 2012;326:41-51.
2	Derosa CA, Furusato B, Shaheduzzaman S, Srikantan V, Wang Z, Chen Y, et al. Elevated osteonectin/SPARC expression in primary prostate cancer predicts metastatic progression. Prostate cancer and prostatic diseases. 2011.
3	Tolonen TT, Tammela TL, Kujala PM, Tuominen VJ, Isola JJ, Visakorpi T. Histopathological variables and biomarkers enhancer of zeste homologue 2, Ki-67 and minichromosome maintenance protein 7 as prognosticators in primarily endocrine-treated prostate cancer. BJU international. 2011;108:1430-8.
4	Andolfo I, De Martino D, Liguori L, Petrosino G, Troncone G, Tata N, et al. Correlation of NM23-H1 cytoplasmic expression with metastatic stage in human prostate cancer tissue. Naunyn-Schmiedeberg's archives of pharmacology. 2011;384:489-98.
5	Ledezma R, Cifuentes F, Gallegos I, Fulla J, Ossandon E, Castellon EA, et al. Altered expression patterns of syndecan-1 and -2 predict biochemical recurrence in prostate cancer. Asian journal of andrology. 2011;13:476-80.
6	Thomasson M, Wang B, Hammarsten P, Dahlman A, Persson JL, Josefsson A, et al. LRIG1 and the liar paradox in prostate cancer: a study of the expression and clinical significance of LRIG1 in prostate cancer. International journal of cancer Journal international du cancer. 2011;128:2843-52.
7	Castilla C, Congregado B, Conde JM, Medina R, Torrubia FJ, Japon MA, et al. Immunohistochemical expression of Hsp60 correlates with tumor progression and hormone resistance in prostate cancer. Urology. 2010;76:1017 e1-6.
8	Comperat E, Roupret M, Drouin SJ, Camparo P, Bitker MO, Houlgatte A, et al. Tissue expression of IL16 in prostate cancer and its association with recurrence after radical prostatectomy. The Prostate. 2010;70:1622-7.
9	Kwon YW, Chang IH, Kim KD, Kim YS, Myung SC, Kim MK, et al. Significance of S100A2 and S100A4 Expression in the Progression of Prostate Adenocarcinoma. Korean journal of urology. 2010;51:456-62.
10	Staibano S, Mascolo M, Di Benedetto M, Vecchione ML, Ilardi G, Di Lorenzo G, et al. BAG3 protein delocalisation in prostate carcinoma. Tumour biology : the journal of the International Society for Oncodevelopmental Biology and Medicine. 2010;31:461-9.
11	Hagglof C, Hammarsten P, Josefsson A, Stattin P, Paulsson J, Bergh A, et al. Stromal PDGFRbeta expression in prostate tumors and non-malignant prostate tissue predicts prostate cancer survival. PloS one. 2010;5:e10747.
12	Leung YK, Lam HM, Wu S, Song D, Levin L, Cheng L, et al. Estrogen receptor beta2 and beta5 are associated with poor prognosis in prostate cancer, and promote cancer cell migration and invasion. Endocrine-related cancer. 2010;17:675-89.
13	Matsumura Y, Shimada K, Tanaka N, Fujimoto K, Hirao Y, Konishi N. Phosphorylation status of Fas-associated death domain-containing protein regulates telomerase activity and strongly correlates with prostate cancer outcomes. Pathobiology : journal of immunopathology, molecular and cellular biology. 2009;76:293-302.
14	Berney DM, Gopalan A, Kudahetti S, Fisher G, Ambroisine L, Foster CS, et al. Ki-67 and outcome in clinically localised prostate cancer: analysis of conservatively treated prostate cancer patients from the Trans-Atlantic Prostate Group study. British journal of cancer. 2009;100:888-93.
15	Mirtti T, Laine VJ, Hiekkanen H, Hurme S, Rowe O, Nevalainen TJ, et al. Group IIA phospholipase A as a prognostic marker in prostate cancer: relevance to clinicopathological variables and disease-specific mortality. APMIS : acta pathologica, microbiologica, et immunologica Scandinavica. 2009;117:151-61.
16	Darnel AD, Behmoaram E, Vollmer RT, Corcos J, Bijian K, Sircar K, et al. Fascin regulates prostate cancer cell invasion and is associated with metastasis and biochemical failure in prostate cancer. Clinical cancer research : an official journal of the American Association for Cancer Research. 2009;15:1376-83.
17	Norris AM, Gentry M, Peehl DM, D'Agostino R, Jr., Scarpinato KD. The elevated expression of a mismatch repair protein is a predictor for biochemical recurrence after radical prostatectomy. Cancer epidemiology, biomarkers & prevention : a publication of the American Association for Cancer Research, cosponsored by the American Society of Preventive Oncology. 2009;18:57-64.
18	Morgan EA, Forootan SS, Adamson J, Foster CS, Fujii H, Igarashi M, et al. Expression of cutaneous fatty acid-binding protein (C-FABP) in prostate cancer: potential prognostic marker and target for tumourigenicity-suppression. International journal of oncology. 2008;32:767-75.
19	Diallo JS, Aldejmah A, Mouhim AF, Peant B, Fahmy MA, Koumakpayi IH, et al. NOXA and PUMA expression add to clinical markers in predicting biochemical recurrence of prostate cancer patients in a survival tree model. Clinical cancer research : an official journal of the American Association for Cancer Research. 2007;13:7044-52.
20	Andren O, Fall K, Andersson SO, Rubin MA, Bismar TA, Karlsson M, et al. MUC-1 gene is associated with prostate cancer death: a 20-year follow-up of a population-based study in Sweden. British journal of cancer. 2007;97:730-4.
21	Forootan SS, Wong YC, Dodson A, Wang X, Lin K, Smith PH, et al. Increased Id-1 expression is significantly associated with poor survival of patients with prostate cancer. Human pathology. 2007;38:1321-9.
22	Shaheduzzaman S, Vishwanath A, Furusato B, Cullen J, Chen Y, Banez L, et al. Silencing of Lactotransferrin expression by methylation in prostate cancer progression. Cancer biology & therapy. 2007;6:1088-95.
23	Li Y, Mizutani Y, Shiraishi T, Okihara K, Ukimura O, Kawauchi A, et al. Prognostic significance of thymidylate synthase expression in patients with prostate cancer undergoing radical prostatectomy. Urology. 2007;69:988-95.
24	Torres-Roca JF, DeSilvio M, Mora LB, Khor LY, Hammond E, Ahmad N, et al. Activated STAT3 as a correlate of distant metastasis in prostate cancer: a secondary analysis of Radiation Therapy Oncology Group 86-10. Urology. 2007;69:505-9.
25	Nishio Y, Yamada Y, Kokubo H, Nakamura K, Aoki S, Taki T, et al. Prognostic significance of immunohistochemical expression of the HER-2/neu oncoprotein in bone metastatic prostate cancer. Urology. 2006;68:110-5.
26	Quek ML, Daneshmand S, Rodrigo S, Cai J, Dorff TB, Groshen S, et al. Prognostic significance of neuroendocrine expression in lymph node-positive prostate cancer. Urology. 2006;67:1247-52.
27	Prtilo A, Leach FS, Markwalder R, Kappeler A, Burkhard FC, Cecchini MG, et al. Tissue microarray analysis of hMSH2 expression predicts outcome in men with prostate cancer. The Journal of urology. 2005;174:1814-8; discussion 8.
28	Bandyopadhyay S, Pai SK, Hirota S, Hosobe S, Tsukada T, Miura K, et al. PTEN up-regulates the tumor metastasis suppressor gene Drg-1 in prostate and breast cancer. Cancer research. 2004;64:7655-60.
29	Bandyopadhyay S, Pai SK, Gross SC, Hirota S, Hosobe S, Miura K, et al. The Drg-1 gene suppresses tumor metastasis in prostate cancer. Cancer research. 2003;63:1731-6.
30	Satoh T, Yang G, Egawa S, Addai J, Frolov A, Kuwao S, et al. Caveolin-1 expression is a predictor of recurrence-free survival in pT2N0 prostate carcinoma diagnosed in Japanese patients. Cancer. 2003;97:1225-33.
31	Bostwick DG, Qian J, Pacelli A, Zincke H, Blute M, Bergstralh EJ, et al. Neuroendocrine expression in node positive prostate cancer: correlation with systemic progression and patient survival. The Journal of urology. 2002;168:1204-11.
32	Wikstrom P, Lissbrant IF, Stattin P, Egevad L, Bergh A. Endoglin (CD105) is expressed on immature blood vessels and is a marker for survival in prostate cancer. The Prostate. 2002;51:268-75.
33	Henshall SM, Quinn DI, Lee CS, Head DR, Golovsky D, Brenner PC, et al. Overexpression of the cell cycle inhibitor p16INK4A in high-grade prostatic intraepithelial neoplasia predicts early relapse in prostate cancer patients. Clinical cancer research : an official journal of the American Association for Cancer Research. 2001;7:544-50.
34	Noordzij MA, van Steenbrugge GJ, Schroder FH, Van der Kwast TH. Decreased expression of CD44 in metastatic prostate cancer. International journal of cancer Journal international du cancer. 1999;84:478-83.
35	Morote J, de Torres I, Caceres C, Vallejo C, Schwartz S, Jr., Reventos J. Prognostic value of immunohistochemical expression of the c-erbB-2 oncoprotein in metastasic prostate cancer. International journal of cancer Journal international du cancer. 1999;84:421-5.
36	Bettencourt MC, Bauer JJ, Sesterhenn IA, Connelly RR, Moul JW. CD34 immunohistochemical assessment of angiogenesis as a prognostic marker for prostate cancer recurrence after radical prostatectomy. The Journal of urology. 1998;160:459-65.
37	Kim IY, Ahn HJ, Lang S, Oefelein MG, Oyasu R, Kozlowski JM, et al. Loss of expression of transforming growth factor-beta receptors is associated with poor prognosis in prostate cancer patients. Clinical cancer research : an official journal of the American Association for Cancer Research. 1998;4:1625-30.
38	Bauer JJ, Sesterhenn IA, Mostofi FK, McLeod DG, Srivastava S, Moul JW. Elevated levels of apoptosis regulator proteins p53 and bcl-2 are independent prognostic biomarkers in surgically treated clinically localized prostate cancer. The Journal of urology. 1996;156:1511-6.
39	Shurbaji MS, Kalbfleisch JH, Thurmond TS. Immunohistochemical detection of p53 protein as a prognostic indicator in prostate cancer. Human pathology. 1995;26:106-9.
40	Umbas R, Isaacs WB, Bringuier PP, Schaafsma HE, Karthaus HF, Oosterhof GO, et al. Decreased E-cadherin expression is associated with poor prognosis in patients with prostate cancer. Cancer research. 1994;54:3929-33.
